1 **Wikipedia as a tool for contemporary history of science: A**  
2 **case study on CRISPR**

3 Omer Benjakob<sup>#,1,2</sup>, Olha Guley<sup>1,2</sup>, Jean-Marc Sevin<sup>1,2</sup>, Leo Blondel<sup>1,2</sup>, Ariane Augustoni<sup>1,2</sup>,  
4 Matthieu Collet<sup>1,2</sup>, Louise Jouveshomme<sup>1,2</sup>, Roy Amit<sup>3</sup>, Ariel Linder<sup>1,2</sup>, Rona Aviram<sup>#,1,2</sup>

5  
6

7 (1) Université Paris Cité, Inserm U1284, System Engineering and Evolution Dynamics, F-75004  
8 Paris, France

9 (2) Learning Planet Institute, F-75004 Paris, France

10 (3) Bezalel academy of arts and design, Israel

11

12 # Corresponding Authors

## 13 Abstract

14

15 Rapid developments and methodological divides hinder the study of how scientific knowledge  
16 accumulates, consolidates and transfers to the public sphere. Our work proposes using  
17 Wikipedia, the online encyclopedia, as a historiographical source regarding contemporary  
18 science. We chose the high-profile field of gene editing as our test case, performing a historical  
19 analysis of the English-language Wikipedia articles on CRISPR. Using a mixed method  
20 approach, we qualitatively and quantitatively analyzed its text, sections and references,  
21 alongside 50 affiliated articles. These, we found, documented CRISPR's maturation from a  
22 fundamental scientific discovery to a biotechnological revolution with vast social and cultural  
23 implications. We developed automated tools to support such research generically and  
24 demonstrated its applicability on two other scientific fields we have previously studied - COVID-  
25 19 and Circadian clocks. This method makes use of Wikipedia as a digital and free archive,  
26 documenting the incremental growth of knowledge and the manner scientific research  
27 accumulates and translates into public discourse. Using Wikipedia in this manner compliments  
28 and overcomes some issues with contemporary histories and can also augment existing  
29 bibliometric research.

## 30 Keywords

31 Wikipedia, CRISPR, History of Science, Scientometrics, Digital Humanities, Science of Science.

## 32 Introduction

33 In recent years, the historically qualitative field of history of science has undergone a data  
34 revolution<sup>1</sup>, with research increasingly making more use of big data and computational  
35 techniques for historical ends<sup>2</sup>. Despite the rise of digital humanities, a divide has persisted  
36 between quantitative historical research and textually rich qualitative work, resulting in a  
37 historiographic lacuna<sup>3</sup>. Meanwhile, a small but growing body of research based on Wikipedia  
38 has emerged at the intersection of bibliometrics<sup>4</sup>, history<sup>5</sup>, health<sup>6</sup>, medical<sup>7</sup> and science<sup>8</sup>. We  
39 suggest the aforementioned lacuna can be partially addressed in the context of the history of  
40 contemporary science by systematizing research methods on an unlikely arena that is rich in  
41 both bibliometric data and historical text: Wikipedia.

42 Now over 20 years old, Wikipedia in English is, per its own definition, the largest and most  
43 popular reference work used by the general public<sup>9</sup>. Wikipedia's science articles top search  
44 engine results, making the open encyclopedia a key node in the transference of academic  
45 knowledge to the public sphere. Once ridiculed for being inherently unreliable, both academic  
46 research and the media have in recent years praised its coverage as being in lock step with  
47 science<sup>10</sup>, especially in light of the COVID-19 pandemic<sup>11</sup>.

48 Wikipedia requires "verifiable" sources to back all factual claims<sup>9</sup>, and research has found that  
49 on medical, health<sup>6</sup> and science<sup>8</sup> topics it has an explicit bias towards academic sources.  
50 Wikipedia facilitates access to knowledge usually kept behind academic paywalls and jargon<sup>12</sup>.  
51 Unlike academic publications focused on the state-of-art of the field or review papers coverage  
52 of the aforementioned, Wikipedia does not aim to publish original research - it only reflects the  
53 scientific consensus based on already published sources. Here, we suggest Wikipedia can also  
54 play a bigger role, serving as a source of knowledge in its own right, regarding the history of  
55 contemporary science, which we demonstrate through a case study on the CRISPR field.  
56 CRISPR-based gene-editing tools have been labeled the scientific "breakthrough" of the 21<sup>st</sup>  
57 century<sup>13</sup>. While CRISPRs were identified in the 1980's, and received their name in 2002<sup>14</sup>, their

58 function remained unclear for many years. In 2005, different labs deduced from *in silico* studies  
59 that CRISPR sequences were part of a bacterial adaptive immune system<sup>15,16,17</sup>.  
60 The academic studies that first performed CRISPR-based directed gene editing *in vitro* were  
61 famously published in 2012: First from the labs of Jennifer Doudna and Emmanuelle  
62 Charpentier<sup>18</sup> and shortly after in a paper of the Virginijus Šikšnys group<sup>19</sup>. These were rapidly  
63 followed by publications in February 2013 that performed genetic engineering *in vivo* in  
64 mammals, led by scientists Fang Zhang<sup>20</sup> and George Church<sup>21</sup>. Thus, the field matured from a  
65 basic science discovery into the ability to utilize CRISPR-associated proteins like Cas9 for  
66 genetic engineering, currently used by countless labs around the globe<sup>22</sup>. Doudna and  
67 Charpentier were awarded the 2020 Nobel Prize for Chemistry for their scientific contribution to  
68 genetic editing technologies, showcasing how the so-called CRISPR revolution has played out  
69 over the past 20 years.

70 In contrast to many other groundbreaking scientific discoveries which remain known only within  
71 scientific circles, human gene editing has also been in the spotlight of much public debate. For  
72 example, many news outlets have dedicated reports to developments in the field and debated  
73 the ethical implications of so-called designer babies<sup>23</sup>. Netflix has even broadcasted a  
74 documentary film dedicated to CRISPR (Human Nature, 2019), underscoring its iconic status in  
75 popular culture.

76 The CRISPR field's brief history has been riddled with controversies, and legal battles over  
77 credit and CRISPR patents were all covered extensively in the media<sup>24</sup>. Most famously, Eric  
78 Lander's perspective in *Cell*, the "Heroes of CRISPR"<sup>25</sup>, was met with fierce criticism<sup>26</sup>. Critics  
79 claimed that the text offered a biased version of the field's history that minimized the roles of  
80 some scientists as part of the patent war raging between academic institutions<sup>27</sup> - going as far  
81 as to label Lander the "villain" of CRISPR<sup>28</sup>. This controversy underscores how scientific outlets,  
82 even those famous for publishing novel scientific research, may not necessarily serve as  
83 reliable historical sources on contemporary science itself.

84 CRISPR is a prime example of a scientific field that has undergone massive growth during  
85 Wikipedia's lifespan. It is an ideal case study as its short history is multi-faceted: a highly  
86 scientific topic with wide-ranging technological and social ramifications. All of these, we found,  
87 were documented on Wikipedia and its different articles, supported by scientific, public and  
88 popular sources alike. Together, our findings - based on an analysis of the CRISPR article and  
89 50 others with related content - suggest that Wikipedia can indeed serve as a tool in the history  
90 of contemporary science. To that end, we put forward a method for using Wikipedia, its articles,  
91 their edit histories and their references: we outline a methodology and provide some automated  
92 tools utilizing Wikipedia's data. Our method relies on both quantitative and qualitative analyses  
93 that may help consolidate the aforementioned conflict between data and content dependent  
94 historical research.

## 95 Results

### 96 1. Delineating the research scope

97 The manner in which a scientific field is represented on Wikipedia requires clear delineation of  
98 scope and span - i.e., the articles that touch on it and the time frame being examined. While a  
99 single article can provide a rich source of textual and historical data, related articles may  
100 represent more nuanced facets of a field - like scientists' biographies or related events and  
101 technologies. Identifying these requires sieving through Wikipedia's massive body of articles -  
102 currently numbering well above 6 million in English alone.

103 For this aim, we propose a stepwise strategy for defining a research corpus about a topic. The  
104 first step utilizes Wikipedia's free-text search function to find all articles that contain the topic  
105 researched (Fig. 1A). In the present study, searching for "CRISPR" yielded 720 Wikipedia  
106 articles containing that term, as of June 2022 (Fig. 1B). Based on subjective reading of these  
107 articles, we found that many made only minor or incidental use of CRISPR. Thus, to permit  
108 qualitative analyses on a more focused pool, we designed the second stage of the research  
109 funnel, which calls for retaining only those articles with the term in either their title or one of their  
110 sections. With respect to CRISPR, this filtering yielded 51 articles (Table S1). Out of these, 10  
111 had CRISPR in their title - and thus focused on it directly - and another 41 that only had it in the  
112 title of one of their sections, and thus touched on it indirectly through an intersection with  
113 another body of knowledge.

114 The main article/s, which we term the "anchor article/s", are those which in subject, text and  
115 focus are fully aligned with the topic being researched; while "auxiliary" articles, that make up  
116 the majority of the corpus, are those that represent secondary aspects of the topic or instances  
117 in which it is embedded within other fields. For this study, the anchor article was "CRISPR",  
118 which was selected semantically based on its title and content. It ranked amongst the top 5

119 articles in terms of size, number of references, and number of edits (Fig. S1), while the other 50  
120 served as auxiliary articles.  
121 Within this CRISPR corpus, several auxiliary articles focused on scientific topics, for example  
122 the article for “CRISPR Activation”, “Cas9”, or “CRISPR gene editing”, while others had wider  
123 scientific topics, such as “Antibiotic”, “Gene knockdown”, and “Genome editing”. Also included  
124 were articles with broad topics, for example “Wheat” which had a section on CRISPR-edited  
125 strains of grain. Another group of articles were those dedicated for scientists, like the 2020  
126 Nobel laureates Doudna and Charpentier, awarded the prize for their groundbreaking work in  
127 the field; or Šikšnys, who also played a pivotal role in CRISPR’s history. Other science-adjacent  
128 articles touched on CRISPR's social aspects e.g., “The CRISPR Journal” and “Designer baby”,  
129 showing how cultural aspects are also captured by this method.  
130 We therefore concluded that these articles provide a good sample of CRISPR related  
131 knowledge.

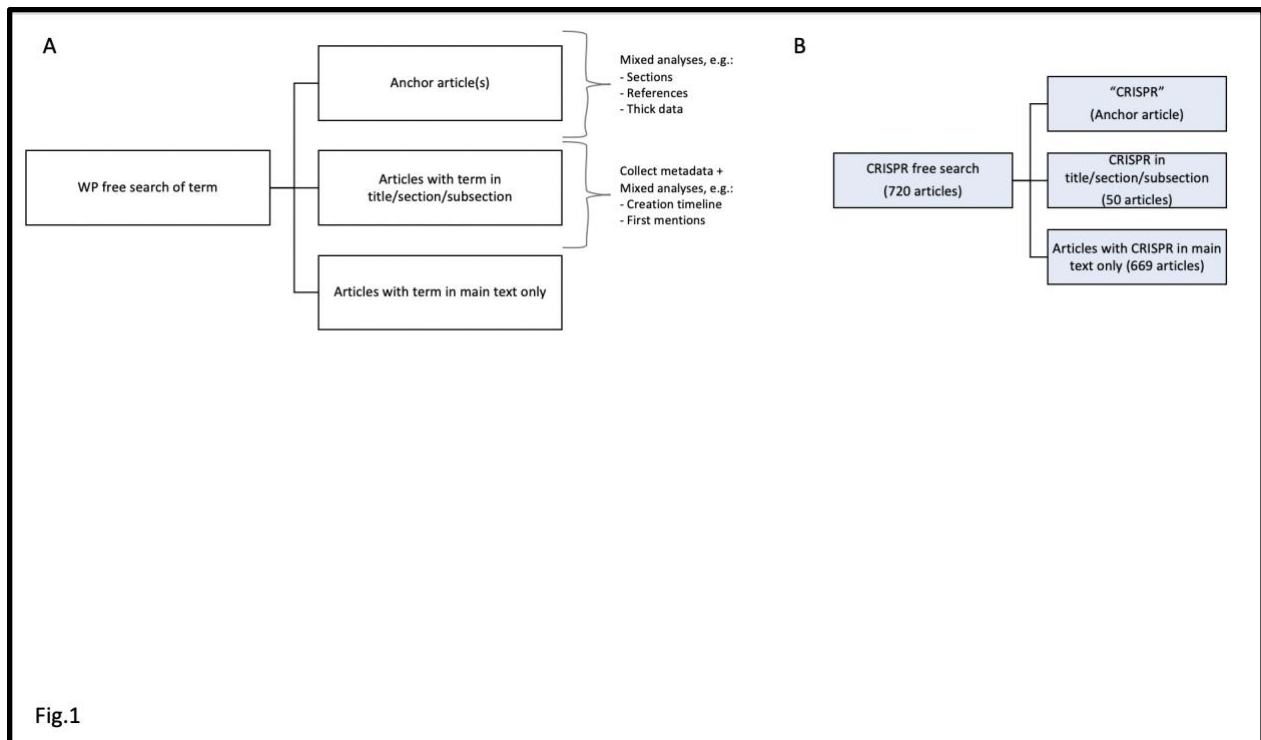

132  
133

134 **Figure 1. Workflow for using Wikipedia to research the history of a specific field. A)**  
 135 Scheme of general flow. A free search of Wikipedia’s English-language articles is conducted to  
 136 identify all the relevant articles; these are then filtered to include only those that have the term in  
 137 either their title or the title of a section. Next, different analyses can be performed on the anchor  
 138 article and the corpus. B) Breakdown of flow scheme in the CRISPR case study, as of June  
 139 2022.  
 140  
 141

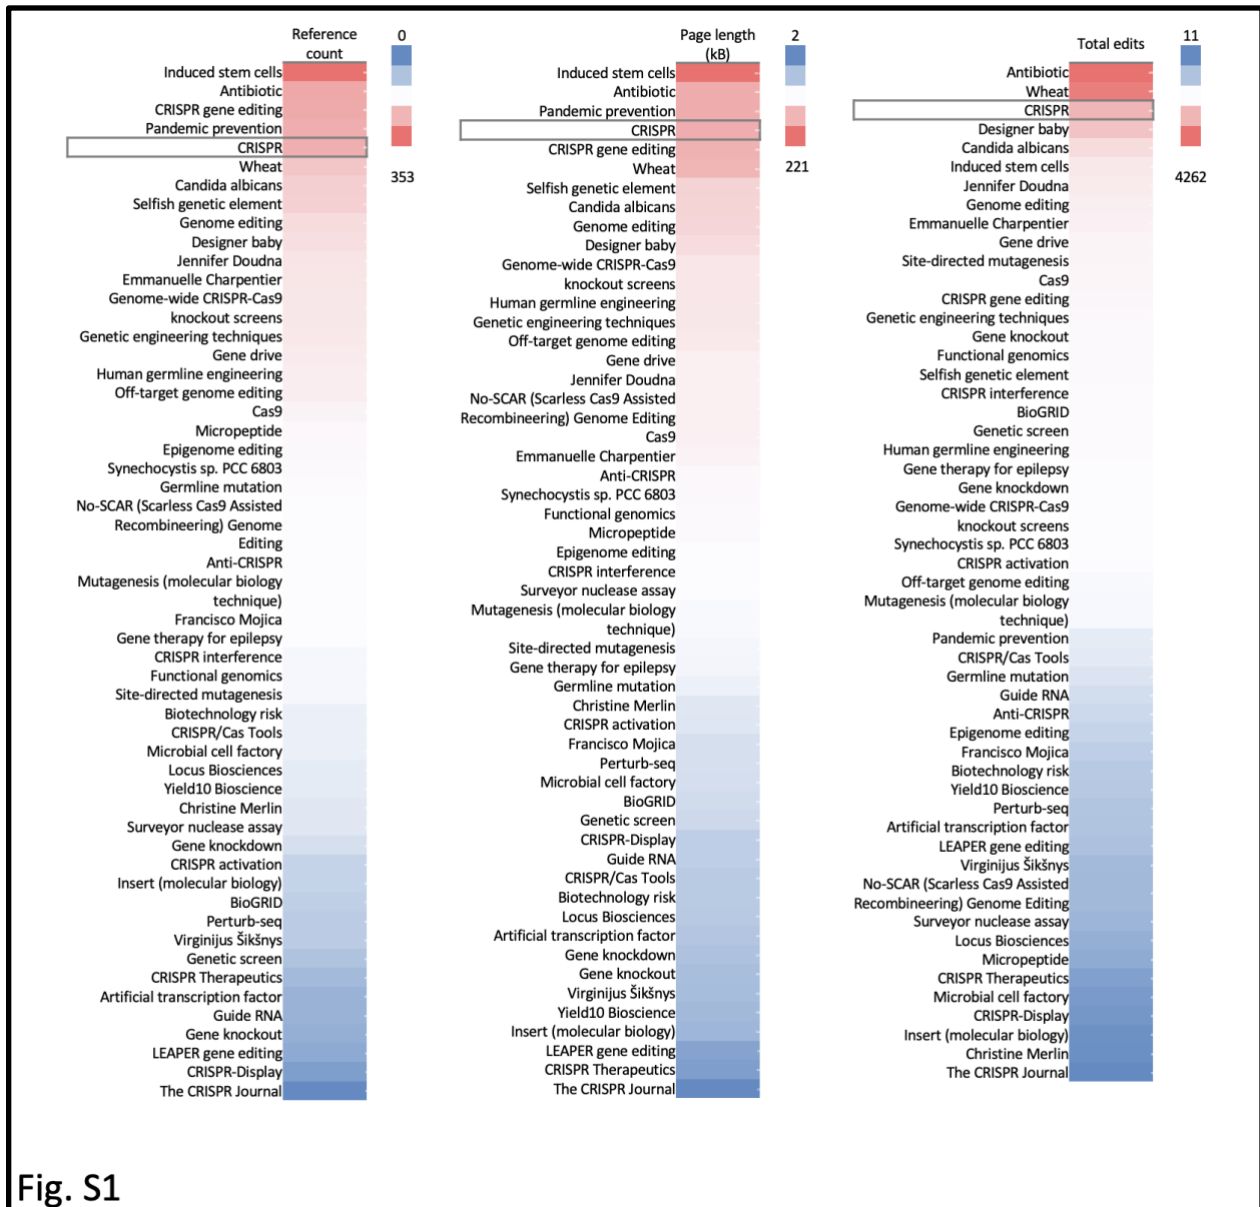

142 **Fig. S1**  
 143  
 144 **Figure S1. The CRISPR corpus in numbers.** The articles included in the corpus, sorted by  
 145 number of references, size in kilobytes (kB) and number of edits. “CRISPR”, highlighted, was  
 146 among the top 5 articles of each category.  
 147



## 148 2. Mixed method analyses for understanding historical growth of knowledge

149 After having established our research scope, we first performed a comparative reading of the  
150 anchor article's past versions, using annual intervals to sample textual and structural changes -  
151 at time narrowing the time frame to provide a more detailed account of the article's historical  
152 textual growth. Thick description is a common methodology in the history and sociology of  
153 science. It is used for providing context and an interpretive framework for research based on  
154 multiple historical sources and diverse types of data. We suggest that unraveling scientific  
155 history through Wikipedia can be achieved by examining and then describing in rich detail the  
156 work of Wikipedia's editors, the references they cited as well as the text these references  
157 supported. Here, this takes the form of reviewing the edit history and references of the CRISPR  
158 anchor article and understanding its interplay with auxiliary articles.

159 To augment the detailed thick description of the changes the article underwent throughout its  
160 development we used several mixed-method analyses. Mixed-methods research<sup>29</sup> combines  
161 quantitative and qualitative analyses and served as the basis for this research, with the data  
162 from Wikipedia and its subsequent analyses leading to textually rich examples interpreted to  
163 provide historical insight. This can be termed Wikipedia-focused "thick big data"<sup>30</sup>, as opposed  
164 to content-agnostic big data approaches. This approach can be used both at the corpus level  
165 and that of specific anchor articles, and together provide a coherent system for researching  
166 other topics.

167 The article for CRISPR was created in June 2005, as what is termed a "stub" on Wikipedia - a  
168 short entry that calls for further elaboration (Fig 2A). This first version included but a single  
169 paragraph elucidating the CRISPR acronym and describing the genetic locus. At the time, there  
170 was no mention of its relation to bacterial immunity or gene editing, two points which would be  
171 integral to the field and as a result the article's lead text in future versions (Fig. 2B).

172 We conducted the initial analysis on the CRISPR article’s architecture, i.e., its table of contents,  
173 and mapped the shifts it underwent since the article’s launch (2005). This “table of contents” or  
174 “section” analysis is a mixed-method: Quantitatively, we measured the overall number of  
175 sections and subsections (Fig. 3A); qualitatively, we reviewed their titles and documented the  
176 changes they underwent to provide insight into the content of the article, with the section titles  
177 serving as a proxy for new units of CRISPR-related knowledge (Table S2).

178 In addition, we examined the growth of the CRISPR corpus, by laying out the articles based on  
179 their Date Of Birth (DOB), (Fig. 3B). Opening new articles on Wikipedia requires the topic at  
180 hand to have a certain level of “notability”<sup>31</sup>. Here too, we combined a quantitative evaluation of  
181 the number of articles being created with a content-dependent reading of their titles. Finally, a  
182 side-by-side view of these two adds another layer of information, interpreted to provide a  
183 narrative to contextualize the findings, as described below.

184 Qualitative reading of the section titles showed that the structural changes were directly linked  
185 to shifts in the article’s content, pertaining to either the accumulation of new knowledge or the  
186 restructuring of the growing field’s representation on Wikipedia. For example, the first sections  
187 added in 2010 were “CRISPR Mechanism”, “CRISPR Spacer and Repeats,” “CAS Genes” and  
188 the reference section (Table S2). These sections pertain to CRISPR’s genetic makeup, and can  
189 be collectively referred to as the basic science behind CRISPR.

190 In 2011, after a few months after a “Discovery of CRISPR” section was added to the article, a  
191 section termed “Evolutionary significance and possible applications” was [created](#). For the next  
192 three years it included three proposed applications:

- 193 • *“Artificial immunization against phage by introduction of engineered CRISPR loci in*  
194 *industrially important bacteria, including those used in food production and large-scale*  
195 *fermentations.*
- 196 • *Knockdown of endogenous genes by transformation with a [plasmid](#) which contains a*  
197 *CRISPR area with a spacer, which inhibits a target gene.*
- 198 • *Discrimination of different bacterial strains by comparison of CRISPR spacer sequences*  
199 *([spoligotyping](#))”*

200 However, these would change in the following year. In a subsequent substantial edit to the  
201 article, in [April 2013](#), a user called *Genomeengineering* made what would be their sole  
202 contribution to Wikipedia: Adding the 2012 paper by Doudna and Charpentier, and the two 2013  
203 publications by Zhang and Church. They also amended the list of possible applications so it now  
204 included “genome engineering at cellular or organismic level by reprogramming of a CRISPR-  
205 Cas system to achieve RNA-guided genome engineering”. In [November](#) of that year the  
206 section’s title changed from “Possible applications” to “Applications”.

207 Alongside this section’s growth, which also saw the birth of the “further reading” section, and a  
208 section dedicated to “external links” was expanded, providing access to new utilities developed  
209 for CRISPR researchers. For example, a link to a “comprehensive software” for CRISPR  
210 guideRNA design was added as well as a link to a tool “for finding CRISPR targets.”

211 At the corpus level, this period also saw a spurt in article creation, with a number of CRISPR-  
212 related articles being created, like “CRISPR interference”. At this time, more articles directly  
213 based on or linked to CRISPR science and its applications were also created. For example,  
214 articles like “Genome editing” (2012) and “Cas9” (2013). It is also during this phase that the  
215 articles for scientists linked to its discovery were opened: an article about Doudna was created  
216 in 2012, coinciding with the publication of her landmark *Science* paper<sup>18</sup>. Soon thereafter,  
217 articles were created for “Epigenome editing” (2014) and “CRISPR/Cas tools” (2015). Thus,  
218 qualitatively, this period can be seen as covering the emergence and establishment of the  
219 applicative side of CRISPR.

220 On March 31, 2014, a few weeks after Doudna and Charpentier applied for a patent for their  
221 work, [a “Patents” section was opened](#). In 2016, the section dealing with patents was expanded  
222 to include a “Patent and commercialization” subsection that included a detailed list of patent  
223 holders that at the time were fighting in the courts over legal ownership and in academic media  
224 over credit (Table S3). At the corpus level, we observed the creation of articles for Charpentier

225 (2015) and Šikšnys (in 2016), in tandem to the credit and patent wars raging over their  
226 respective discoveries.

227 In February 2019, with the patent wars reaching their resolution, the section (then four  
228 paragraphs long) [was completely removed from the article](#). However, it was not deleted, but  
229 rather [migrated](#) to a new article called “CRISPR gene editing,” opened that month in a big text-  
230 migration out of the anchor article. Also migrated was the section “Society and culture”, which  
231 described the ability to conduct human gene editing in terms of the wider social debate about it  
232 and the policy changes it sparked.

233 Other migrations were seen throughout the article’s history, also evident at the corpus level: In  
234 2017, the “Knockdown/activation” subsection forked and expanded to an article of its own  
235 (“CRISPR interference”). A subsection about “Recognition” that attempted to attribute the  
236 CRISPR discovery to specific persons also moved to the new “CRISPR gene editing” article.

237 The migration of key sections into “CRISPR gene editing” is evident in the drop in the number of  
238 sections in 2019 and is reflected in the uptick in the growth of the number of articles in the  
239 corpus, when, alongside the new fork article, “genome-wide CRISPR-cas9 knockout screens”,  
240 “the CRISPR Journal” and “LEAPER gene editing” all got new articles that year or in 2020. This  
241 later phase also continued to document the growth of the biotech industry based on CRISPR,  
242 for example CRISPR Therapeutics, a company co-founded by Charpentier, received an article  
243 in 2021, further highlighting the field’s maturation and growth in technology. Tellingly, 2020 also  
244 saw the creation of a “Pandemic prevention” article, which, in tandem with the COVID-19  
245 pandemic, detailed all the medical and scientific attempts to preempt viral outbreaks - including  
246 those that could potentially make use of CRISPR. Articles like these raise an interesting  
247 question regarding the role of CRISPR in other bodies of knowledge and warrant an  
248 examination of the wider corpus.

249

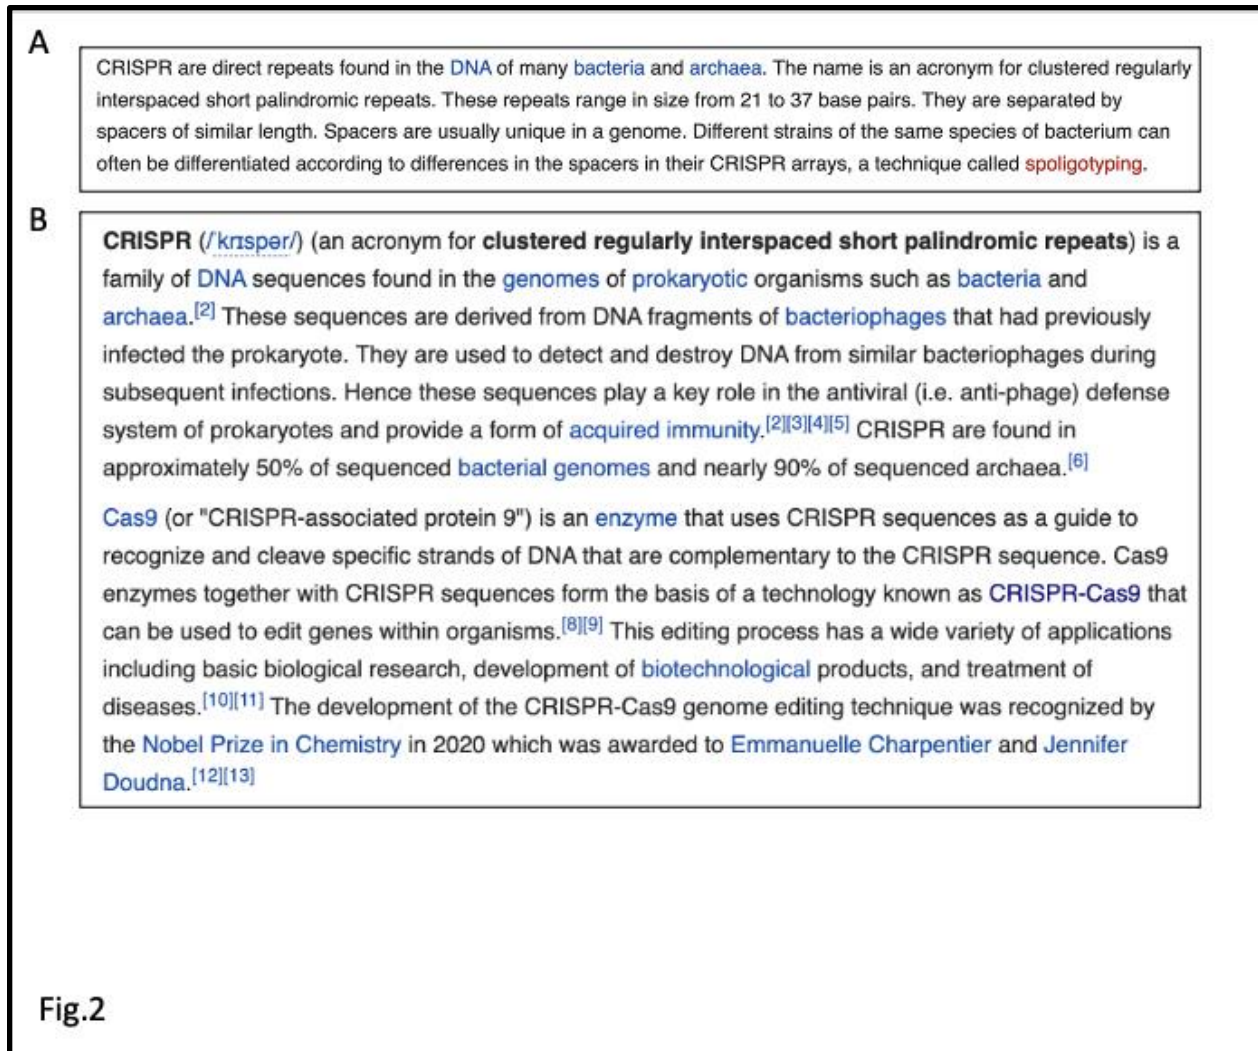

250

251 **Figure 2. Comparing versions of the CRISPR article.** A snapshot from the Wikipedia archive  
252 of A) the full text of the CRISPR article when it first opened on June 30th 2005, and B) the lead  
253 section's opening paragraphs, as of July 6th, 2022.

254

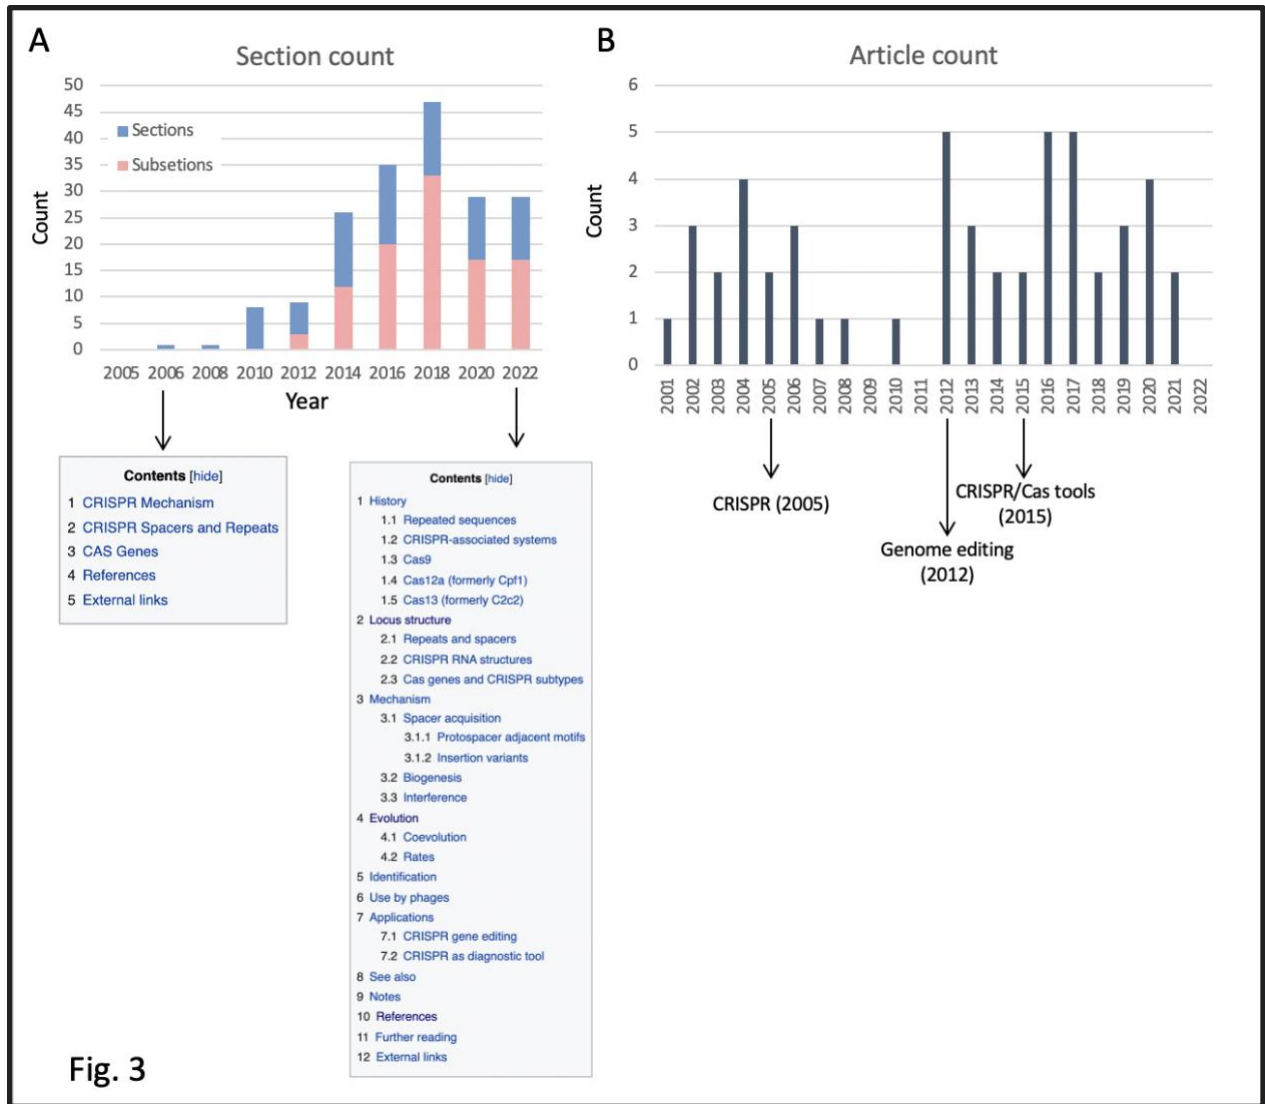

255  
256

257 **Figure 3. Growth of CRISPR on Wikipedia - anchor article and corpus.** A) The number of  
258 sections and subsections in the CRISPR article, since it was opened in 2005. B) The number of  
259 the corpus' articles opened since Wikipedia was launched (2001).

### 260 3. Cross-pollination: CRISPR as a body of knowledge

261 Shifts at the corpus level showed that knowledge on Wikipedia is rarely confined to a single  
262 article, but is rather stored in groups of articles that are constantly changing and cross-pollinate  
263 one another. On Wikipedia, this process can take on two distinct forms: new articles opening  
264 about the topic that directly address it, or existing articles changing to include new text,

265 references or sections dedicated to the scientific topic's intersection with other bodies of  
266 knowledge. Tracking the migration between articles can illuminate how knowledge diffuses.  
267 To better understand the temporal aspect of CRISPR's representation across articles on  
268 Wikipedia we next compared the DOB of the different articles in our CRISPR corpus and the  
269 date the term CRISPR was first mentioned in them.  
270 Of the 50 articles in the CRISPR corpus, 26 already had the term "CRISPR" in their first version  
271 (Fig. 4A). Among these were the articles for researchers like Charpentier, Šikšnys and Mojica.  
272 This group also included articles for scientific topics discovered in later stages of the CRISPR  
273 field's growth, like "Cas12", and articles reflecting CRISPR in culture, like the aforementioned  
274 academic journal. With few exceptions, like "CRISPR" and "CRISPR interference", opened in  
275 2005 and 2010, respectively, articles that were created with CRISPR already mentioned in their  
276 first version were mostly opened post-2014 (Fig. 4B).  
277 The 24 articles that lacked "CRISPR" in their inception provide insight into the growth of the field  
278 over time. Importantly, many concepts now associated with CRISPR did actually exist prior to its  
279 discovery or its application in gene editing was known. A prime example, "Gene knockout" and  
280 "Gene knockdown" existed as articles prior to CRISPR. However, as we saw, in a later stage  
281 their content was recast to take CRISPR into account and the articles were retroactively  
282 affiliated with the CRISPR field (in 2017 and 2013, respectively). Similarly, "Genome editing"  
283 was opened in 2012 but mentioned CRISPR only in 2014. The article "Designer baby", [opened](#)  
284 [in 2005](#), initially only as a theoretical issue used in "popular scientific and bioethics literature."  
285 However, this changed with CRISPR's rise to prominence and since 2018 it directly referenced  
286 CRISPR, with a lengthy debate in wake of the "He Jiankui affair", in which the Chinese scientist  
287 created in 2018 the world's first so-called CRISPR babies in a widely reported incident.  
288 We could also observe CRISPR's interface with other scientific fields through articles related to  
289 wider topics. For example, the two oldest articles in the corpus, "Wheat" and "Antibiotic", were  
290 opened in 2001, and were late to adopt "CRISPR" some twenty years later.

291 In sum, this analysis revealed a clear divide between articles that mentioned CRISPR from the  
 292 onset and those that incorporated the term only in later stages: In general, this analysis  
 293 underscores how CRISPR ramified across Wikipedia not just in the form of new articles, but  
 294 also recasting older ones.

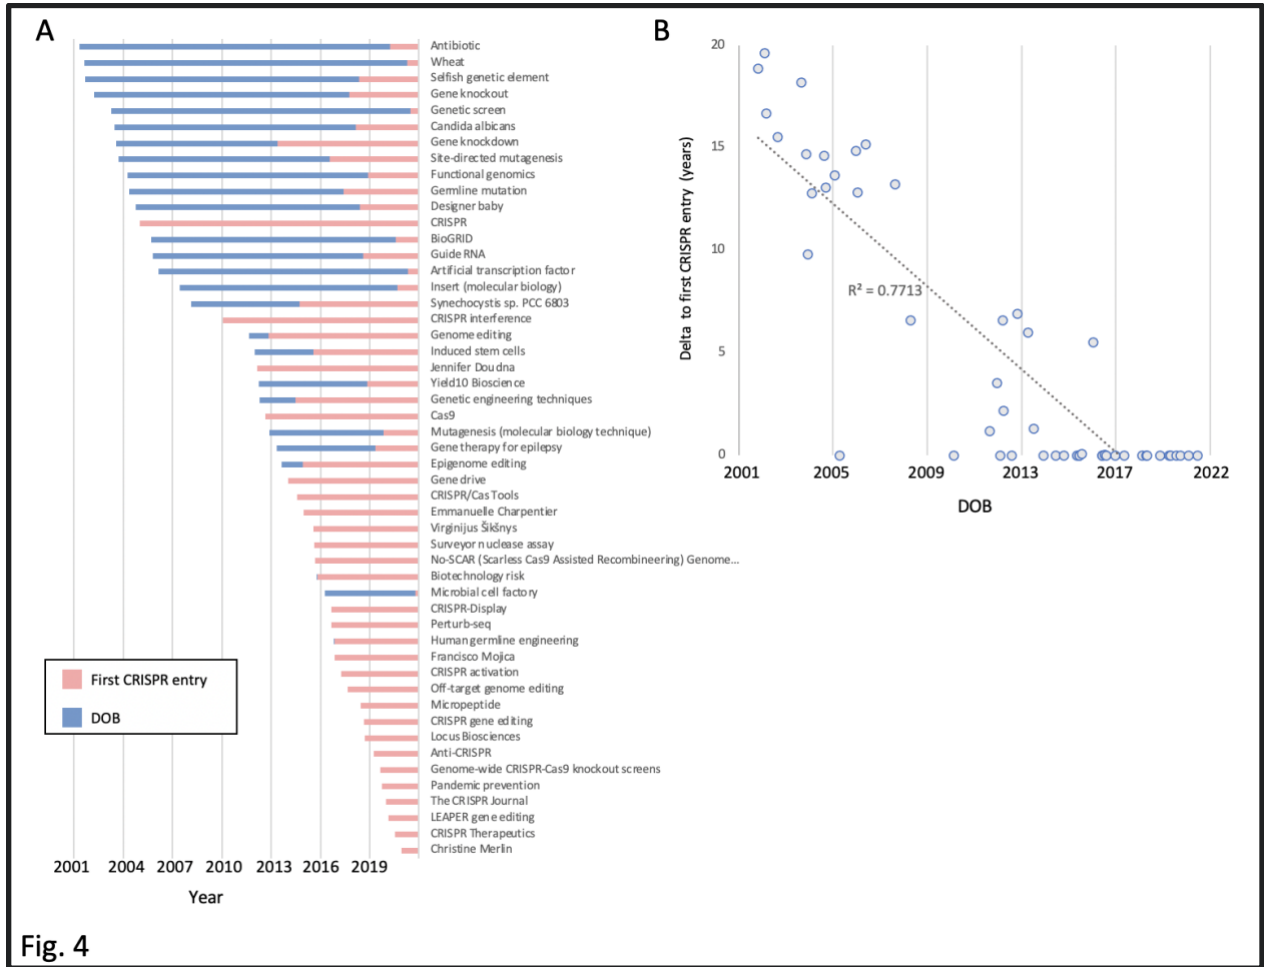

295

Fig. 4

296 **Figure 4. Comparing an article's creation date and CRISPR's first mentions.** A) An article's  
 297 date of birth (DOB, blue) compared to the year of its first mention of the term CRISPR (red),  
 298 sorted by the former. B) The relation between the DOB and the time it took for the first mention  
 299 of CRISPR of each article. Displayed is a linear trendline and  $R^2$ .



#### 300 4. From lab to public: Wikipedic bibliometrics map the diffusion of 301 knowledge over time

302 All claims on Wikipedia need to be attributed to a verifiable source<sup>32</sup>. For our purposes, these  
303 references constitute substance for additional analyses: combining quantitative bibliometric  
304 analyses like citation count, with a content-dependent evaluation of the actual sources, to better  
305 understand the types of references supporting the “anchor” article. Quantitatively, we have  
306 previously developed two bibliometric analyses for Wikipedia articles - the “SciScore”, which  
307 gauges the ratio of academic to non-academic sources<sup>11</sup>, and the “Latency”, which gauges the  
308 duration between an academic paper’s publication and when it was referenced in a Wikipedia  
309 article<sup>33</sup>. The reference list of each article in the corpus is parsed to break down the identity of  
310 its different sources: “.org”, “.com” and those containing DOIs/PMIDs/PMCs (i.e., scientific  
311 papers). Thus, we can assign a SciScore at both the corpus level and that of an individual  
312 article.

313 We found that the CRISPR anchor article was supported by 208 external sources in its  
314 “References” and “Further reading” sections (Fig. 5A). The article’s SciScore was 0.92 (out of  
315 1), ranking 13/51 in the corpus (Figs. 5B and S2A). The top cited journal was *Science* (23  
316 papers), followed by *Nature* and *Cell* (14 each), (Fig. S2B and S2C). These results are  
317 consistent with previous analyses of Wikipedia articles focused on scientific topics that show  
318 that these make use of peer reviewed, high-impact factor academic publications<sup>4,8</sup>.

319 To attain a historical perspective, we next analyzed the temporal aspect of the above discussed  
320 bibliometric parameters, which were compared and contextualized to the changes in sections  
321 (Fig. 3A). We found that these metrics, and overlapping trends between them, served as  
322 markers for important events in the history of the field. A prime example of this can be seen in  
323 the aforementioned “Patents” section: on March 6, 2014 Doudna’s and Charpentier’s patent  
324 application was published online and a few weeks later the [“Patents” section was opened](#) in the

325 CRISPR article (Table S3). It cited the US Patent Office website. By 2015, after the Broad  
326 Institute was awarded its own patent and the appeal against it was filed by the universities  
327 representing Doudna and Charpentier, the article's text changed to indicate that, "As of  
328 December 2014, patent rights to CRISPR were still developing." The text also noted that there  
329 was "a bitter fight over the patents for CRISPR", a claim supported by this new type of citation  
330 which grew increasingly present in the CRISPR article: non-academic sources, in the form of  
331 both news articles about the legal cases and even the patents themselves. For example, the  
332 claim about the "bitter" legal battle was sourced to a story in MIT Technology Review, a popular  
333 science news site, while also referring directly to specific patents and or formal application  
334 documents made public online. Overall, the section included a laundry list of patent holders and  
335 claimants with a hodgepodge of popular and legal sources as citations. Throughout its entire  
336 existence, all the sources in this section were non-academic.

337 The fact that non-academic sources were deployed in the article to support non-academic  
338 aspects of the CRISPR history shows how these types of sources can document non-scientific  
339 ramifications of scientific developments. However, the entrance of non-academic sources was  
340 not limited to patent debates and also touched on CRISPR's growing social prominence. For  
341 example, the 2015 selection of CRISPR as "Breakthrough of the year"<sup>34</sup> was supported by links  
342 to popular media sources. Together with the patent links, these non-academic sources led to a  
343 decrease in the article's SciScore during this phase (Fig. 5B).

344 Collectively, these highlight how bibliometric shifts are reflective of substantive changes in the  
345 article's texts, which in turn are reflective of real-world developments in the field, both in terms of  
346 the science and of the social debates it inspires.

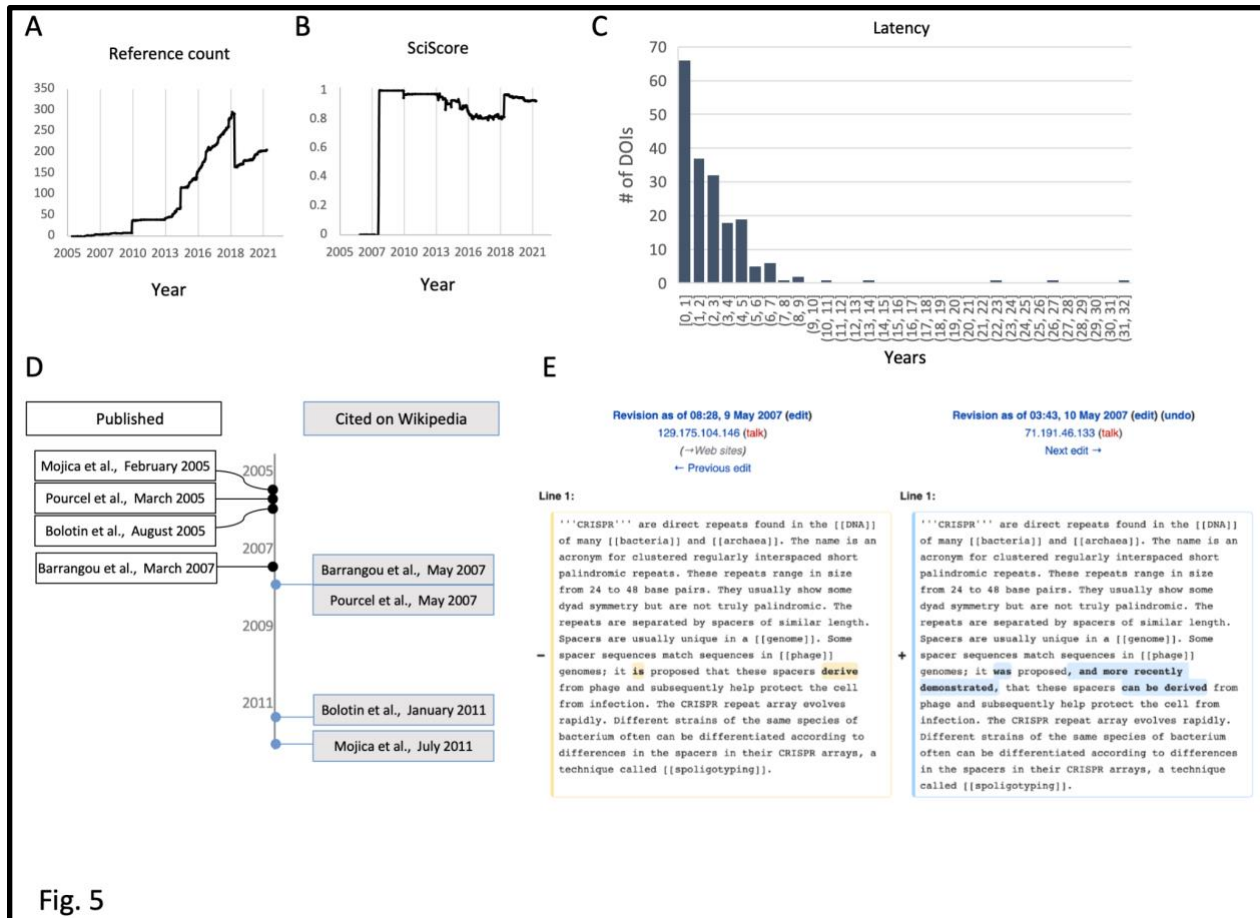

Fig. 5

347  
348

349 **Figure 5. CRISPR bibliometrics on Wikipedia.** A) The number of references in the “CRISPR”  
350 article’s reference section since it opened until December 2021. B) “CRISPR”’s SciScore (until  
351 December 2021). C) The article’s references latency distribution (i.e., delay between a scientific  
352 paper’s publication and its integration into Wikipedia). D) A timeline comparing the date of  
353 selected publications (black frames, left) to their citation in the CRISPR article (blue frames,  
354 right). E) A side-by-side comparison of two versions of the CRISPR article from May 2007,  
355 showing how changes to the wording of the text were linked to the citation of Barrangou et al.,  
356 2007.

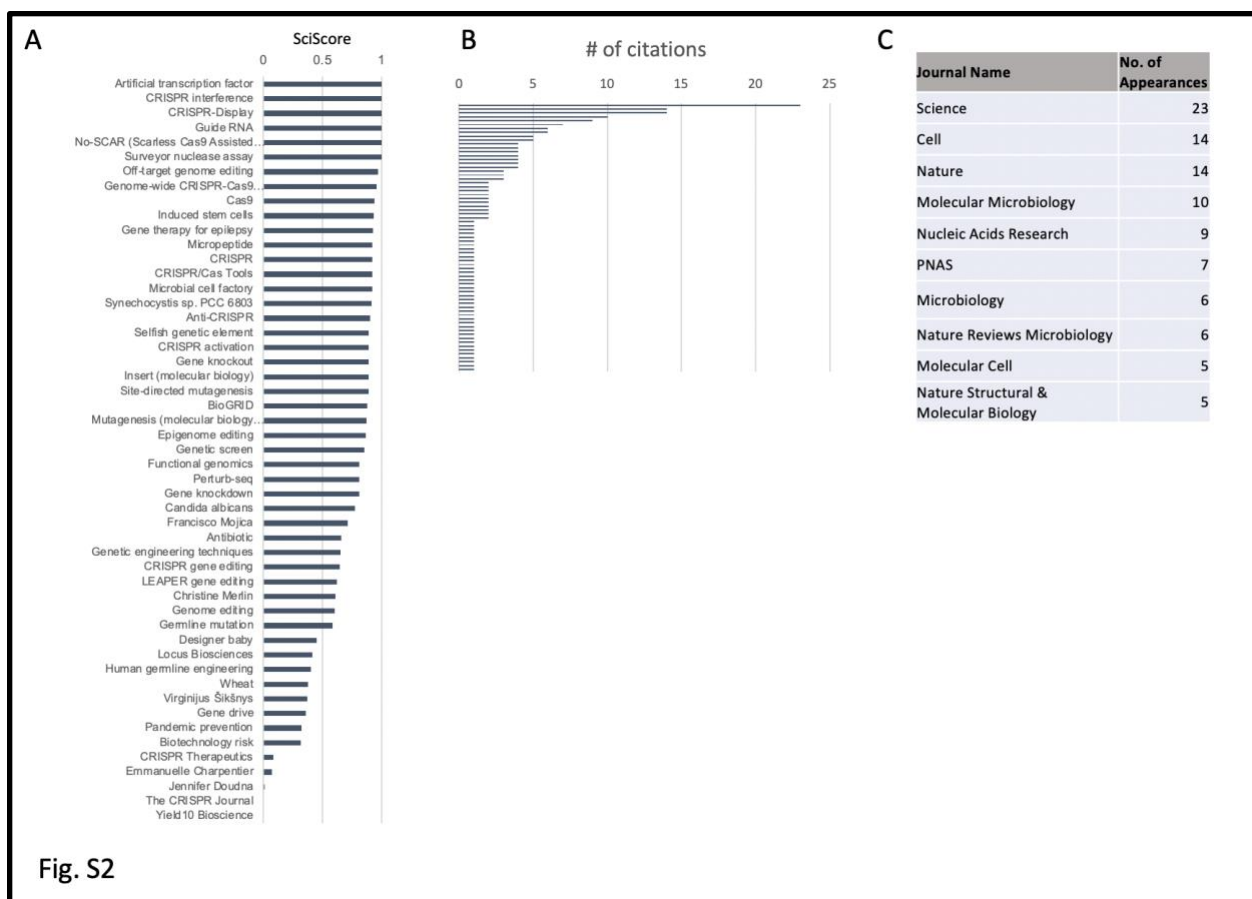

357

358 **Figure S2. CRISPR article's references.** A) The corpus SciScore. B) Peer-reviewed journals  
 359 cited as references in the article as of June 2022, sorted by the number of references per  
 360 publication. C) A list of the top cited journals (from B) with  $\geq 5$  appearances.

361

362 To better understand the relationship between Wikipedia and the sources supporting its articles  
 363 we also conducted bibliometric analysis on the corpus, too. Thus, we found a number of articles  
 364 with high SciScores (like "CRISPR interference" or "Cas9") alongside those with low percentage  
 365 of academic sources, like that for Mojca or the concept of designer babies (Fig. S2A). This  
 366 indicates a correlation between the scientificness of an article's topic and its SciScore, with  
 367 biographical articles for scientists, for example, usually ranking lower than those for scientific  
 368 concepts.

369 The "CRISPR" article ranked high in terms of SciScore. To gauge its current score with the state  
 370 of the available research, we determined the latency of all the article's references. This analysis

371 revealed a distribution varying between a single day to >30 years, with a median latency of 1.7  
372 years (Fig. 5C). This bibliometric data can be contextualized through the example of the  
373 integration dynamics of publications relating CRISPR to bacterial immunity (Fig. 5D). Rodolphe  
374 Barrangou was the R&D director of genomics at DuPont chemicals manufacturer, who was first  
375 to have harnessed CRISPRs to provide immunity for their industrial bacterial strains. The  
376 resulting study was published in 2007, and was [integrated](#) into Wikipedia that year, a mere two  
377 months after going online. In this edit the text changed from “it **is proposed** that these spacers  
378 ... protect the cell from infection” to “it **was proposed, and more recently demonstrated**, that  
379 these [can...] help protect the cell from infection” (bold added), (Fig. 5E). Only after this  
380 experimental demonstration were three landmark yet theoretical papers from 2005 that  
381 computationally supported the bacterial immune system hypotheses added to the article, and  
382 with a relatively large latency: Pourcel et al., 2005 was added two years after its publication,  
383 while Mojica et al., and Bolotin et al., were added only in 2011 - six years after publication. By  
384 this time, the text and the early references, as well as CRISPRs function in bacterial immunity  
385 and the experimental evidence - were all inserted into the article’s lead section, too. These  
386 quantitative shifts in bibliometrics, we found, were the result of textual changes in the article,  
387 which reflected changes in the science itself.

## 388 5. Quantitative comparison between fields on Wikipedia

389 To examine whether the aforementioned methodology can provide insight into other scientific  
390 fields on Wikipedia, we developed an automated tool which generates corpuses along the  
391 aforementioned funnel (Fig. 1A) - and can be deployed on any search term of interest. The  
392 automated corpus creation is followed by a number of subsequent data collections that together  
393 form our suggested method and allow for cross field comparisons.

394 Alongside CRISPR, we deployed the tool on two additional terms- “Circadian” and  
395 “Coronavirus”, which we have studied in different manners in earlier preliminary studies<sup>33,11</sup> and

396 thus serve as control groups to some degree. We hence created three corpuses side by-side, at  
397 roughly the same time - June/July 2022, and demonstrated some of the aforementioned  
398 quantitative analyses.

399 As we observed for the CRISPR field, a substantial number of articles can be identified and  
400 selected to be part of the corpus - with 51, 138, and 306 articles for “CRISPR”, “Circadian”, and  
401 “Coronavirus”, respectively (Fig. 6, Tables S4 and S5). A subjective reading of the titles  
402 comprising these corpuses validated that they provide a diverse assortment of articles of  
403 different types that are relevant to each field - for example, articles for scientists alongside those  
404 for scientific terms or events. Thus, the corpus for “Circadian” yielded the articles “Circadian  
405 rhythms” and “Sleep”, and the corpus for “Coronavirus” yielded articles both about the pandemic  
406 like “COVID-19 pandemic in Japan” and more generally for “Virus”.

407 After an initial corpus creation, the first automated analysis generates a timeline based on each  
408 articles’ DOB. A side-by-side view of all three corpus timelines (Fig. 6A) illustrates how different  
409 fields display different modes of growth. For example, the “Coronavirus” timeline reveals a clear  
410 divide between scientific articles like “Pandemic” (2001) and “Spike protein” (2006), created  
411 early on in Wikipedia’s history, and post-pandemic articles like “Wuhan Institute of Virology”  
412 (2020). This timeline clearly shows how, with the outbreak of the pandemic, articles about the  
413 virus ballooned, but also how these were supported by a network of preexisting articles<sup>9</sup>.

414 Meanwhile, the “Circadian” timeline exhibits a seemingly random distribution of article creation,  
415 with anchor articles (“Circadian Clock” and “Circadian Rhythms”), and auxiliary articles opening  
416 regularly over time. Some DOBs appear to tell a compelling scientific story - e.g., Paul Hardin,  
417 first author of the landmark paper highlighted in the 2017 Nobel declaration<sup>35</sup>, received an article  
418 in 2017 - but these seem anecdotal. Interestingly, the biannual peaks are likely a product of the  
419 American chronobiologist Eric Herzog’s university course<sup>36</sup>, selected according to the students’  
420 personal inclination. This DOB pattern or lack thereof can be explained by the fact that unlike  
421 the timeliness of CRISPR or coronavirus, clocks are a more mature field whose growth, as our

422 previous work has shown, is reflected in a more subtle manner on Wikipedia, with a  
423 paradigmatic shift in the field being documented in minute nuanced textual detail<sup>33</sup>.  
424 One similarity between all three timelines is an increase in article creation centered around  
425 2005-7, a period which has been shown to have held a massive surge in article creation in  
426 Wikipedia in general<sup>37</sup>.  
427 Our tool also supports automated scraping of bibliometric data. This analysis showed that the  
428 top ten journal references in all three corpuses were dominated with high impact-factor  
429 academic peer-reviewed publications (Fig. 6B). Alongside prestigious scientific publications like  
430 Nature or PNAS, each corpus also included field-specific publications: For example, the Journal  
431 of Biological Rhythms in the Circadian list, Nature Biotechnology for CRISPR, or The Journal of  
432 Virology for coronavirus.  
433 Non-academic references were also quite field-specific. As researchers from both the circadian  
434 clocks and CRISPR fields were awarded a Nobel Prize, the website for the prestigious award  
435 was among the most cited in the respective corpuses (Fig. 6C). In addition, the Sleep  
436 Foundation website was highly cited in the circadian corpus while three genome focused  
437 websites were highly cited in the CRISPR corpus. The International Committee on Taxonomy of  
438 Viruses (ICTV) was among the top 10 .org sites cited in the coronavirus corpus, which appears  
439 in the Wikipedia article for every variant.  
440 In general, the CRISPR and Circadian corpuses relied more on scientific literature, while  
441 Coronavirus referenced mostly .com sources (Fig. 6D), which is also reflected in the different  
442 corpuses' SciScore (Fig. 6E). It appears the more prominent a scientific field is societally, the  
443 lower its scientific score: for example the non-scientifically focused CRISPR-corpus article about  
444 designer babies which had a relatively low score, as did the Circadian-corpus article of "Start  
445 school later movement." Meanwhile, the more clearly scientifically focused articles "Surveyor  
446 nuclease assay" and "CSNK1D" had high scores. The patterns of SciScore distribution show  
447 how different fields manifest differently and that comparing them can shed light, for example, on

448 how much public, as opposed to purely scientific interest, a field has online. In summary, these  
 449 analyses show how the same research tools and methods yield very different results for  
 450 different research fields, all of which can facilitate the initial steps needed towards the creation  
 451 of future case studies into how scientific knowledge is represented on Wikipedia over time.  
 452

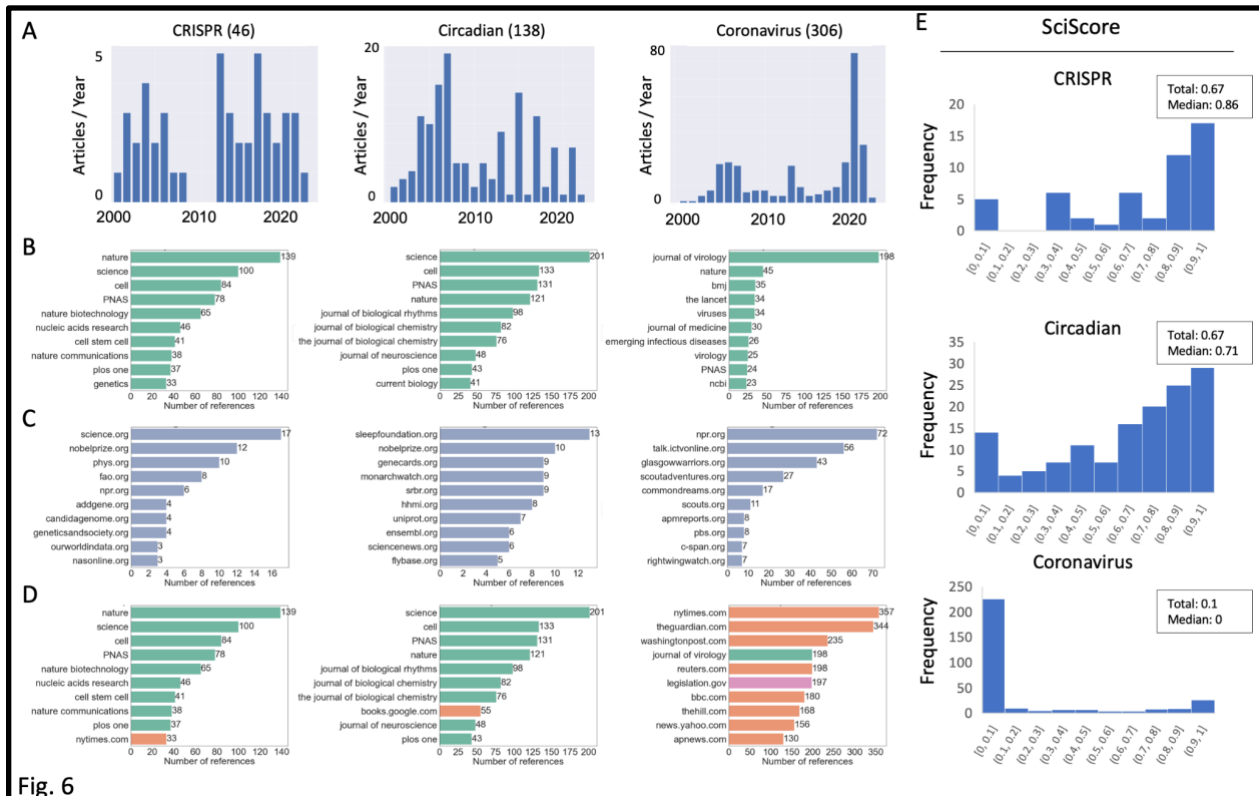

453 Fig. 6

454  
 455 **Figure 6. Comparing Wikipedia corpuses: Different fields show different data.** Corpuses  
 456 were generated and quantitative metrics automatically collected in June-July 2022, for the terms  
 457 “CRISPR”, “Circadian” and “Coronavirus”. The following data are presented: A) the number of  
 458 articles opened each year, B) the top 10 most cited journals, C) the top 10 most cited .org  
 459 websites, D) the top 10 most cited references altogether, E) SciScore distribution, along with the  
 460 total (sum of all references) and median scores.



## 461 Discussion

462 Here, we examined the way CRISPR was represented on Wikipedia from the site's launch in  
463 January 2001 until 2022. By reviewing the CRISPR article's history, we saw that the article  
464 started off describing the "basic science" behind CRISPR, and was updated in the wake of the  
465 publication of canonical works in the field. Over time, the article grew, and with the emergence  
466 of gene editing technology it forked off into a number of affiliated articles with a more narrow  
467 focus, while the original CRISPR article offered a consolidated overview of the scientific  
468 narrative on CRISPR in bacterial systems. The article's text and its different citations served as  
469 a rich record of the growth of academic knowledge, the legal battles CRISPR sparked and the  
470 academic credit wars over what the journal *Science* called the "CRISPR Craze"<sup>38</sup>, as well as the  
471 popular interest in the field.

472 We thus propose this method can be used to perform history of contemporary science on other  
473 topics using Wikipedia. This begins with corpus delineation, followed by a historical analysis of  
474 the sections of the anchor article and the timeline of all corpus articles. Both quantitative and  
475 qualitative methods are used to track these dynamics, augmented with bibliometric analyses -  
476 namely the SciScore and latency. Moreover, automated tools developed to support this  
477 research permit work on additional topics, though combining these with manual and semantic  
478 work are key to contextualizing findings and interpreting them to provide substantial historical  
479 insight.

## 480 Using Wikipedia for the history of science

481 Our findings join a small yet growing body of research dedicated to using Wikipedia for historical  
482 purposes. Previously, we analyzed the growth of two Wikipedia articles dedicated to the  
483 circadian clock field through their edit histories ("Circadian clocks" and "Circadian rhythms"),  
484 using them to ask whether the article's text reflected changes taking place in understanding how

485 biological clocks work<sup>33</sup>. Within that more focused case-study we observed the importance of  
486 following the academic references, and developed the Latency metric. Meanwhile, our study on  
487 COVID-19 used large-scale quantitative bibliometrics to understand how the pandemic affected  
488 large swathes of articles during its “first wave”, putting forward metrics such as the SciScore to  
489 qualify hundreds of articles based on their reference list<sup>11</sup>. Collectively, these underscore the  
490 key role academic sources play on Wikipedia and serve as a wider proof-of-concept for the  
491 quantitative and qualitative underpinnings of this present study.

492 Wyatt suggested in a theoretical paper that Wikipedia could be used as a primary source in  
493 historical research<sup>39</sup>. From the edit history of articles, to metadata for traffic and even talk  
494 pages, he envisaged treating the open-source encyclopedia as an “endless palimpsest”. This is  
495 an idea that has also previously been expressed as an artwork: “The Iraq War: A Historiography  
496 of Wikipedia Changelogs” by artist James Bridle was 12-volume a book comprising all the  
497 versions of the article dedicated to the war in Iraq, with the online edit wars serving as a proxy  
498 for the real-world conflict. However, to our knowledge, no academic demonstration nor a clear  
499 method has yet been put forward as to how researchers can actually use Wikipedia to utilize  
500 Wikipedia’s historiographic potential to serve as this “endless palimpsest”, especially not in the  
501 interest of following shifts in science.

502 Different attempts to harness Wikipedia for historical ends were reported in recent years as  
503 computational methods permeate the non-exact and -natural sciences, including history and  
504 philosophy<sup>40</sup>, through what is termed digital humanities<sup>41</sup>. For example, an algorithmic approach  
505 was deployed to mine the text of tens of thousands of Wikipedia articles to try to map the history  
506 of knowledge since the dawn of human history, using network science and semantic analysis to  
507 “put the ideas of Kuhn to the test”. The study, published as a preprint<sup>5</sup>, makes interesting  
508 findings, but also shows the lack of a unification in methods in current Wikipedia-based  
509 historical research. There are numerous studies, for example, about Wikipedia and  
510 bibliometrics<sup>4</sup>, even those that focus on science<sup>8</sup>; but none that clearly link scientometrics to

511 historical methods<sup>42</sup>. Others from the more humanistic side of academia have worked to  
512 connect the digital arena to contemporary fields like discourse analysis, based on the works of  
513 Michele Foucault<sup>43</sup>. However, these too are all theoretical works and as of yet no programmatic  
514 paper has outlined how Wikipedia can be actually used for historical research. We hope our  
515 proposed method will encourage use of Wikipedia's ever-changing text as a rich historical  
516 source to augment existing work being done in the history of science and contribute to our  
517 understanding of the growth of scientific knowledge and its transference to the general public.

## 518 Why Wikipedia

519 Wikipedia easily lends itself to research of this type. A digital and open website that is easily  
520 searchable, it also provides a simple to use API for more complex queries and even a full dump  
521 of the entirety of Wikipedia in each language, including the full edit history of every article.  
522 Wikipedia's inherent structure allows comparable historical work across different fields, primarily  
523 since all articles are structured in a similar way: a lead text, table of contents, sections and then  
524 a reference list. Thus, cross-analyses of different subjects can yield results comparable through  
525 standardized metrics, like the DOB timelines, and the Latency or SciScore metrics for  
526 bibliometric comparisons. The structural similarity creates a sort of internal control that lays the  
527 groundwork for a rigid research system that can be utilized by others and applied to additional  
528 fields.

529 An initial method for selecting such future case studies could be to focus on the topics selected  
530 by Science and others as "Breakthrough of the Year" - these and their relevant Wikipedia  
531 articles are documented in a special list on Wikipedia<sup>44</sup> that could serve as the origin of many  
532 corpuses. Scientific developments that have garnered public interest over the past two decades,  
533 from the human genome project to Alpha Fold, could also serve as lucrative case-studies, each  
534 providing a unique dataset that could then be compared. Mapping out additional fields can  
535 eventually support theories/models of scientific growth in a resolution never before possible.

536 Moreover, unlike social media websites that collect user data, posing ethical dilemmas for  
537 researchers, Wikipedia collects no such information, making it and its data ideal for social  
538 research. Wikipedia's texts are not single-handedly written and are edited collectively in a form  
539 of what is termed peer-production. Though this system is not without its flaws, in the context of  
540 the contemporary history of science it proves a valuable resource: documenting the consensus  
541 regarding certain facts and fields' growth in real-time and in potentially minute details.  
542 Wikipedia provides a rich source of information as one can easily see past versions of these  
543 articles through what is termed the changelog. This continuum of text throughout time is a well-  
544 known historical practice using other sources, and compliments the classic analysis of historical  
545 scientific texts: reading changing versions of the same text as opposed to only comparing  
546 different scientific reviews and papers. This allows researchers to map the changes of specific  
547 parts of the article's text, structure and references and easily track new additions and deletions.  
548 Past versions that did not survive Wikipedia's mob review process or that included facts that  
549 were true at the time but have since been rendered obsolete prove especially interesting from  
550 the perspective of the history of science. For example, with CRISPR, a December 2005 version  
551 of the article described Cas1 as the "most important" of the cas systems, and one that is  
552 "present in almost every CRISPR/Cas system." This was more cautiously reworded in July 2010  
553 so that, "The most important of the Cas proteins appears to be Cas1, which is ubiquitous" in  
554 CRISPR systems. In March 2011, Cas1's ubiquity was no longer said to be linked to its  
555 importance, and for the past decade the article has made due with noting in a subsection  
556 dedicated to CRISPR locus that "[m]ost CRISPR-Cas systems have a Cas1 protein." These  
557 changes were the result of new knowledge forcing a reevaluation of the preexisting scientific  
558 narrative regarding CRISPR: Cas1 was not falsified per se, rather its importance in CRISPR's  
559 story was reassessed. Another example from the CRISPR article can be seen in the shift in  
560 section title from "Potential Applications" to "Applications" regarding gene editing, which took  
561 place in [November 2013](#). These are examples of what can be termed "negative" knowledge -

562 knowledge whose relevance was negated by new “positive” discoveries that outweighed it in  
563 significance. However, as such, its degradation of scientific status in CRISPR’s narrative, has  
564 much value from the historical perspective. Wikipedia, we suggest, is an inclusive media that  
565 documents both positive and negative knowledge, - the accumulation and the rejection of  
566 scientific facts through its edit history.

## 567 Wikipedic Bibliometrics

568 Bibliometrically, Wikipedia can be seen to be a much more inclusive than academic  
569 publications, making use of non-academic sources usually excluded from academic texts. As  
570 suggested above, we propose that the unique structure of Wikipedia facilitates comparison  
571 between different fields through the bibliometric analyses like SciScore and Latency. On  
572 CRISPR, for example, legal sources or popular media were added to support the “patent war”,  
573 which was also expressed in a drop in the article’s SciScore. The expansion and then  
574 contraction of the “Patents” section (Table S3), in tandem to the patent wars and their  
575 resolution, show how this historical inclusivity touches to both the text and to the sources.  
576 The SciScore reveals a different historical perspective when comparing the CRISPR and  
577 COVID-19 corpuses. We previously discovered a decrease in the SciScore as the pandemic  
578 grew to public prominence and more articles about it were opened<sup>11</sup>. This was because many of  
579 the new articles opened post-pandemic were about its social ramifications and outcomes, while  
580 the pre-pandemic articles focused on the science behind the virus. In the CRISPR anchor  
581 article, the SciScore revealed a completely different process: As CRISPR began as a purely  
582 scientific discovery, the decrease in SciScore (~2013-2018, Fig. 5A) was found to be the result  
583 of the appearance of the first non-academic sources about the looming “The CRISPR Craze”<sup>38</sup>,  
584 followed by the much-publicized patent and credit wars, and finally the wider social, ethical and  
585 policy debates it sparked.

586 Latency analyses, which has yet to be successfully automated, revealed that CRISPR, a  
587 nascent field, was making use of extremely up-to-date papers, in some cases references were  
588 added within days of their publication. Meanwhile, the circadian clock article had a median  
589 latency of five years<sup>33</sup>. This coincides with the respective histories of the fields: CRISPR is a  
590 new emerging field, with advances in the field being mirror almost instantaneously on Wikipedia.  
591 On the other hand, clocks, which is a mature field that has been around for decades, was also  
592 found to be based on older research which predated Wikipedia. Meanwhile, COVID-19 had a  
593 major 17-year peak in latency, exactly in line with the SARS pandemic of 2003; hence, research  
594 from a preceding viral pandemic provided the backbone of the sourcing of the 2020 pandemic.  
595 Together these show how the character of each field is reflected in its bibliometrics.  
596 One hypothesis regarding the potential of the SciScore and Latency is that this dynamic may  
597 also be taking place in other articles that began as purely scientific but are increasingly taking  
598 on social significance. Tracking articles that have short latencies and high SciScore which then  
599 begin to decrease could serve as a method for identifying new fields only now starting to make  
600 waves in terms of public interest.

601 Using Wikipedia bibliometrics also has value from the scientometric perspective. Measuring the  
602 impact of scientific research is a mature field that has in recent years expanded the metrics it  
603 works with - no longer just impact factor and citation counting, as new metrics like AltMetrics  
604 have emerged. In this sense, Wikipedia, too, can prove a valuable addition in the form of  
605 alternative metrics. Asking which papers are cited on Wikipedia and in which context, may  
606 provide insight into what parts of academic research are actually reaching the public. As such,  
607 our work can join and enrich existing studies on the history of contemporary science,  
608 augmenting their work in the field of bibliometrics or even Alt-Metrics, with Wikipedia.

## 609 The benefit of mixed methods

610 Our method can perhaps be best described as an example of “thick big data”<sup>30</sup>, a data-driven  
611 sociological and semantically sensitive contextual reading. The data, in our case, is Wikipedia’s  
612 edit history and its sources, which are then analyzed through mixed methods and interpreted in  
613 a detailed manner.

614 The DOB timeline, for example, provides a qualitative dataset regarding the growth rate of the  
615 articles related to the topic, but a qualitative reading of their titles provides substantive context  
616 for this growth. The section analysis provides important quantitative insight regarding the  
617 article’s growth and structure while also permitting a semantic understanding of the architecture  
618 of knowledge and how it shifted over time as sections grew, contracted or migrated.

619 We suggest that employing these types of analyses is key to historical research into Wikipedia.

620 The historical methods born with historian Derek J. de Solla Price that made use of publication  
621 data<sup>42</sup> joined the works of earlier thinkers like Robert K. Merton that laid the historiographic  
622 framework for historical research into the scientific revolution<sup>45</sup>. Later on, sociological works,  
623 written by historians like Robert Darnton on the history of books offered a qualitative detail-rich  
624 chronicle of the rise of scientific media during the Enlightenment, substantiating the  
625 scientometrics of history<sup>46</sup>. Along this line, we propose that analysis that is content-dependent  
626 and does not shy away from the semantic shifts is needed. Though tools, quantitative analyses  
627 and bibliometrics all help systematize research of Wikipedia, the historical work requires delving  
628 deep into the archive, so to speak. Hitherto, work of this type on Wikipedia was done either  
629 manually on a single article as aforementioned<sup>33</sup> - or others with a large-scale use of the entirety  
630 of Wikipedia as a dataset<sup>47</sup>, analyzed for biometric trends<sup>48</sup>, for example finding the most cited  
631 journals across English-language articles<sup>4</sup>. A mixed-method that meshes automatization and  
632 quantitative analyses with a textual reading to provide context and an “interpretive framework”<sup>49</sup>  
633 as suggested herein, has yet to be done with a focus on Wikipedia.

## 634 Limitations

635 For all its benefits, this method also has its shortcomings. To begin with, corpus lineation can  
636 exclude possibly valuable articles - for example, the article for George Church was absent from  
637 our corpus despite his seemingly important role in the history of CRISPR.

638 From a scientometric perspective, Wikipedia also poses some unique problems: Unlike  
639 bibliometric datasets created especially for such purposes, Wikipedia's footnotes are not all  
640 properly formatted and issues with their templates exist that make scrapping them consistently  
641 hard<sup>50</sup>, especially with older articles. Initially, all footnotes on Wikipedia were added manually by  
642 editors working directly in wiki-code, the HTML markup language the website uses. Over time,  
643 bots and tools were put into place to help this menial task and unify footnotes formatting; in  
644 some cases, older articles with older footnotes that did not benefit from this unified new  
645 formatting will not be scrapped properly if one uses only Wikipedia's native bibliometric data. To  
646 overcome this issue in the present study, we scraped the references from the articles as simple  
647 text, regardless of how they were formatted by Wikipedia's volunteer editors. This list of  
648 references was then analyzed in search of DOIs/PMIDs/PMCs which were taken as a proxy for  
649 academic publications. Nonetheless, other issues exist, for example duplicate DOIs or DOIs  
650 included in article's texts and not just as footnotes. A manual validation of our method in random  
651 articles revealed this approach had a margin of error that was lower than 5 percent.

652 Moreover, our method also does not yet address all of Wikipedia's content: For example, the  
653 talk page, a key arena in Wikipedia and one that is rich in textual data, was not systematically  
654 included in this study, though debates about the patent war were found, and these included  
655 discussions of which type of sources (legal as opposed to scientific) should be cited on the  
656 article in this context. Another facet of Wikipedia we did not address touches on visual  
657 elements. Wikipedia's sister project, WikiCommons, supports multimedia, usually in the form of  
658 copyright-free images, and in this respect we also saw a growth: The first infographic explaining



659 the CRISPR system was introduced to the article in [2009](#) and the file itself was updated [in 2010](#)  
660 to show a more complex understanding of the “CRISPR prokaryotic antiviral defense  
661 mechanism”, supported by a then-newly published review article<sup>51</sup>. Over time, additional more  
662 complex images were added to the article, for example those showing how CRISPR  
663 interference could be used for gene editing (Fig. 7). This multimedia aspect can serve in the  
664 future as a rich arena for like-minded research, for example by focusing on how infographics  
665 and scientific illustrations document growth of scientific knowledge overtime.

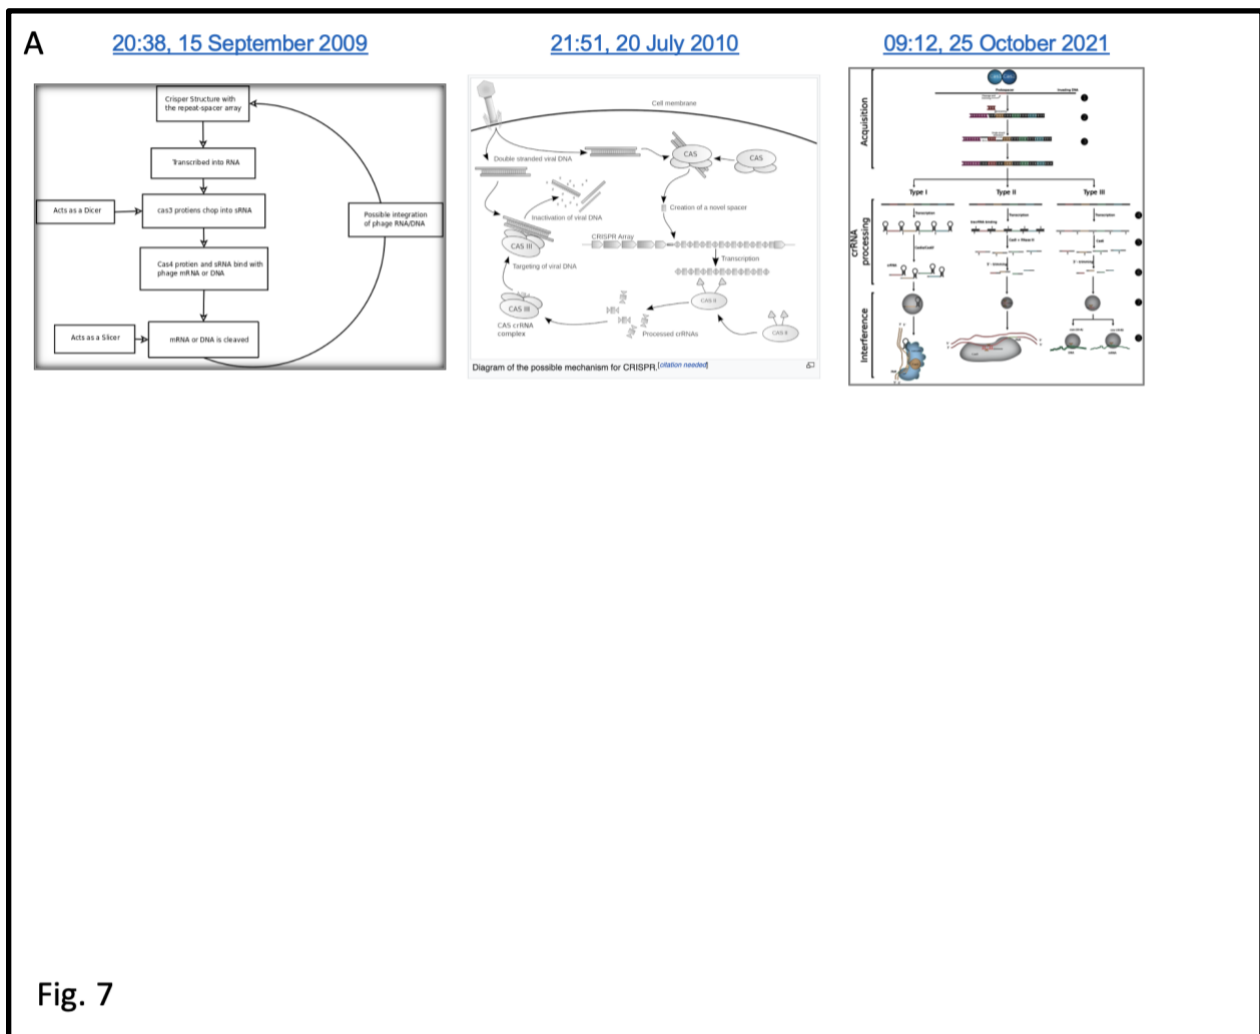

666

667 **Figure 7. Illustrations of the CRISPR model.** Shown are a selection of screen grabs from the  
668 CRISPR article, reflecting the evolution of Wikicommons graphics of CRISPR’s mechanism of  
669 action and key players. These are of different versions of the same illustration (A and B) and of  
670 a third illustration added later to the article.

## 671 Data accessibility

672 Our code for the corpus builder can be found at:

673 <https://github.com/RonaTheBrave/WikiCorpusBuilder>

674

675 The article's data is accessible at <https://zenodo.org/record/7206381#.Y1JoEezP23I>

676 DOI:10.5281/zenodo.7206381.

## 677 Competing interests

678 The authors declare no competing interests.

## 679 Acknowledgements

680 We want to thank Dusan Misevic, Bastian Greshake Tzovaras, Marc Santolini, Mad Price Ball  
681 and all those who provided feedback.

## 682 Funding

683 Thanks to the Bettencourt Schueller Foundation long term partnership, this work was partly  
684 supported by the LPI Research Fellowship, Université de Paris, INSERM U1284, to RAv and  
685 OB.

## 686 Footnotes

687 © 2022 The Author(s)

## 688 References

- 689 1. Sepkoski, D. Towards “A Natural History of Data”: Evolving Practices and Epistemologies of  
690 Data in Paleontology, 1800–2000. *J. Hist. Biol.* **46**, 401–444 (2013).
- 691 2. Rheinberger, H.-J. Infra-Experimentality: From Traces to Data, from Data to Patterning Facts.  
692 *Hist. Sci.* **49**, 337–348 (2011).
- 693 3. Maree, D. J. F. The Methodological Division: Quantitative and Qualitative Methods. in  
694 *Realism and Psychological Science* 13–42 (Springer International Publishing, 2020).  
695 doi:10.1007/978-3-030-45143-1\_2.
- 696 4. Teplitskiy, M., Lu, G. & Duede, E. Amplifying the impact of open access: Wikipedia and the  
697 diffusion of science. *J. Assoc. Inf. Sci. Technol.* **68**, 2116–2127 (2017).
- 698 5. Ju, H. *et al.* The network structure of scientific revolutions. (2020).
- 699 6. Maggio, L. A., Steinberg, R. M., Piccardi, T. & Willinsky, J. M. Reader engagement with  
700 medical content on Wikipedia. *eLife* **9**, (2020).
- 701 7. Jemielniak, D., Masukume, G. & Wilamowski, M. The Most Influential Medical Journals  
702 According to Wikipedia: Quantitative Analysis. *J. Med. Internet Res.* **21**, e11429–e11429  
703 (2019).
- 704 8. Arroyo-Machado, W., Torres-Salinas, D., Herrera-Viedma, E. & Romero-Frías, E. Science  
705 through Wikipedia: A novel representation of open knowledge through co-citation networks.  
706 *PLOS ONE* **15**, e0228713–e0228713 (2020).
- 707 9. Wikipedia contributors. Wikipedia — Wikipedia, The Free Encyclopedia. (2022).
- 708 10. *Wikipedia @ 20: Stories of an Incomplete Revolution*. (The MIT Press, 2020).  
709 doi:10.7551/mitpress/12366.001.0001.
- 710 11. Benjakob, O., Aviram, R. & Sobel, J. A. Citation needed? Wikipedia bibliometrics during  
711 the first wave of the COVID-19 pandemic. *GigaScience* **11**, (2022).

- 712 12. Couto, L. & Teixeira Lopes, C. Equal opportunities in the access to quality online health  
713 information? A multi-lingual study on Wikipedia. in 1–13 (ACM, 2021).  
714 doi:10.1145/3479986.3480000.
- 715 13. Cohen, J. A cut above: pair that developed CRISPR earns historic award. *Science* **370**,  
716 271–272 (2020).
- 717 14. Jansen, R., Embden, J. D. A. van, Gaastra, W. & Schouls, L. M. Identification of genes  
718 that are associated with DNA repeats in prokaryotes. *Mol. Microbiol.* **43**, 1565–75 (2002).
- 719 15. Mojica, F. J. M., Díez-Villaseñor, C., García-Martínez, J. & Soria, E. Intervening  
720 sequences of regularly spaced prokaryotic repeats derive from foreign genetic elements. *J.*  
721 *Mol. Evol.* **60**, 174–82 (2005).
- 722 16. Pourcel, C., Salvignol, G. & Vergnaud, G. CRISPR elements in *Yersinia pestis* acquire  
723 new repeats by preferential uptake of bacteriophage DNA, and provide additional tools for  
724 evolutionary studies. *Microbiol. Read. Engl.* **151**, 653–663 (2005).
- 725 17. Bolotin, A., Quinquis, B., Sorokin, A. & Ehrlich, S. D. Clustered regularly interspaced  
726 short palindrome repeats (CRISPRs) have spacers of extrachromosomal origin. *Microbiol.*  
727 *Read. Engl.* **151**, 2551–2561 (2005).
- 728 18. Jinek, M. *et al.* A programmable dual-RNA-guided DNA endonuclease in adaptive  
729 bacterial immunity. *Science* **337**, 816–21 (2012).
- 730 19. Gasiunas, G., Barrangou, R., Horvath, P. & Siksnys, V. Cas9-crRNA ribonucleoprotein  
731 complex mediates specific DNA cleavage for adaptive immunity in bacteria. *Proc. Natl. Acad.*  
732 *Sci. U. S. A.* **109**, E2579-86 (2012).
- 733 20. Cong, L. *et al.* Multiplex genome engineering using CRISPR/Cas systems. *Science* **339**,  
734 819–23 (2013).
- 735 21. Mali, P. *et al.* RNA-guided human genome engineering via Cas9. *Science* **339**, 823–6  
736 (2013).

- 737 22. Han, W. & She, Q. CRISPR History: Discovery, Characterization, and Prosperity. *Prog.*  
738 *Mol. Biol. Transl. Sci.* **152**, 1–21 (2017).
- 739 23. Marcon, A., Master, Z., Ravitsky, V. & Caulfield, T. CRISPR in the North American  
740 popular press. *Genet. Med.* **21**, 2184–2189 (2019).
- 741 24. Wolfe, J. *U.S. appeals court upholds MIT, Harvard patents on CRISPR gene editing.*  
742 <https://www.reuters.com/article/us-ucberkeley-crispr-idUSKCN1LQ1XP> (2018).
- 743 25. Lander, E. S. The Heroes of CRISPR. *Cell* **164**, 18–28 (2016).
- 744 26. Why Eric Lander’s Controversial Paper “The Heroes of CRISPR” Is Not Solid Historical  
745 Research. *American Scientist* [https://www.americanscientist.org/blog/macroscope/why-eric-](https://www.americanscientist.org/blog/macroscope/why-eric-lander%E2%80%99s-controversial-paper-%E2%80%9Cthe-heroes-of-crispr%E2%80%9D-is-not-solid-historical)  
746 [lander%E2%80%99s-controversial-paper-%E2%80%9Cthe-heroes-of-crispr%E2%80%9D-is-](https://www.americanscientist.org/blog/macroscope/why-eric-lander%E2%80%99s-controversial-paper-%E2%80%9Cthe-heroes-of-crispr%E2%80%9D-is-not-solid-historical)  
747 [not-solid-historical](https://www.americanscientist.org/blog/macroscope/why-eric-lander%E2%80%99s-controversial-paper-%E2%80%9Cthe-heroes-of-crispr%E2%80%9D-is-not-solid-historical) (2017).
- 748 27. “Heroes of CRISPR” Disputed. *The Scientist Magazine*® [https://www.the-](https://www.the-scientist.com/news-opinion/heroes-of-crispr-disputed-34188)  
749 [scientist.com/news-opinion/heroes-of-crispr-disputed-34188](https://www.the-scientist.com/news-opinion/heroes-of-crispr-disputed-34188).
- 750 28. The Villain of CRISPR. <https://www.michaeleisen.org/blog/?p=1825>.
- 751 29. *Debates in the Digital Humanities 2019*. (University of Minnesota Press, 2019).  
752 doi:10.5749/j.ctvg251hk.
- 753 30. Jemielniak, D. *Thick big data: doing digital social sciences*. (Oxford University Press,  
754 2020).
- 755 31. Wikipedia contributors. Notability in the English Wikipedia — Wikipedia, The Free  
756 Encyclopedia. (2022).
- 757 32. Wikipedia:Verifiability. *Wikipedia* (2022).
- 758 33. Benjakob, O. & Aviram, R. A Clockwork Wikipedia: From a Broad Perspective to a Case  
759 Study. *J. Biol. Rhythms* **33**, 233–244 (2018).
- 760 34. And Science’s 2015 Breakthrough of the Year is... | Science | AAAS.  
761 <https://www.science.org/content/article/and-science-s-2015-breakthrough-year>.

- 762 35. The Nobel Prize in Physiology or Medicine 2017. *NobelPrize.org*  
763 <https://www.nobelprize.org/prizes/medicine/2017/press-release/>.
- 764 36. Chiang, C. D. *et al.* Learning chronobiology by improving Wikipedia. *J. Biol. Rhythms* **27**,  
765 333–336 (2012).
- 766 37. Suh, B., Convertino, G., Chi, E. H. & Pirolli, P. The singularity is not near: slowing growth  
767 of Wikipedia. in *Proceedings of the 5th International Symposium on Wikis and Open*  
768 *Collaboration - WikiSym '09 1* (ACM Press, 2009). doi:10.1145/1641309.1641322.
- 769 38. Pennisi, E. The CRISPR Craze. *Science* **341**, 833–836 (2013).
- 770 39. Wyatt, L. Endless palimpsest: Wikipedia and the future's historian. *Stud. High. Educ.* **45**,  
771 963–971 (2020).
- 772 40. Zurn, P. & Bassett, D. S. Seizing an opportunity. *eLife* **8**, e48336 (2019).
- 773 41. Su, F. & Zhang, Y. Research output, intellectual structures and contributors of digital  
774 humanities research: a longitudinal analysis 2005–2020. *J. Doc.* **78**, 673–695 (2022).
- 775 42. Price, D. J. D. S. *Little Science, Big Science*. (Columbia University Press, 1963).  
776 doi:10.7312/pric91844.
- 777 43. Gredel, E. Digital discourse analysis and Wikipedia: Bridging the gap between  
778 Foucauldian discourse analysis and digital conversation analysis. *J. Pragmat.* **115**, 99–114  
779 (2017).
- 780 44. Breakthrough of the Year. *Wikipedia* (2022).
- 781 45. Merton, R. K. & Shapere, D. *The Sociology of Science: Theoretical and Empirical*  
782 *Investigation*. *Phys. Today* **27**, 52–53 (1974).
- 783 46. Porter, C. A. & Darnton, R. The Business of Enlightenment: A Publishing History of the  
784 Encyclopedie 1775-1800. *Eighteenth-Century Stud.* **13**, 335 (1980).
- 785 47. Yang, D., Halfaker, A., Kraut, R. & Hovy, E. Identifying Semantic Edit Intentions from  
786 Revisions in Wikipedia. in 2000–2010 (Association for Computational Linguistics, 2017).  
787 doi:10.18653/v1/D17-1213.

- 788 48. Mostafa, M. M. Two decades of Wikipedia research: a PubMed bibliometric network  
789 analysis. *Glob. Knowl. Mem. Commun.* (2021) doi:10.1108/GKMC-03-2021-0056.
- 790 49. Rowlands Bruce. Grounded in Practice: Using Interpretive Research to Build Theory.  
791 *Electron. J. Bus. Res. Methodol.* **3**, 81–92 (2005).
- 792 50. Pooladian, A. & Borrego, Á. Methodological issues in measuring citations in Wikipedia: a  
793 case study in Library and Information Science. *Scientometrics* **113**, 455–464 (2017).
- 794 51. Horvath, P. & Barrangou, R. CRISPR/Cas, the immune system of bacteria and archaea.  
795 *Science* **327**, 167–170 (2010).
- 796
